# Supplementary material
Source: PubMed Central journal article supplement (PMC11029730)
Supplement: 262_2011_1035_MOESM2_ESM.pdf [file 262_2011_1035_MOESM2_ESM.pdf]

| <b>Markers</b>                   |           | <b>Vendor</b> | <b>Clone</b> | <b>Isotype</b> |
|----------------------------------|-----------|---------------|--------------|----------------|
| <b>CD5</b>                       | PE or APC | BD Bioscience | 57-7.3       | IgG2a, k       |
| <b>CD8</b>                       | PerCP     | BD Bioscience | 57-6.7       | IgG2a, k       |
| <b>Foxp3</b>                     | FITC      | eBioscience   | FJK-16s      | IgG2a, k       |
| <b>CD4</b>                       | PE        | BD Bioscience | RM4-5        | IgG2a,k        |
| <i>Activation markers</i>        |           |               |              |                |
| <b>CD28</b>                      | PE        | BD Bioscience | 37.51        | IgG2, l1       |
| <b>CD25</b>                      | PE        | BD Bioscience | 7D4          | IgM, k         |
| <b>CD44</b>                      | PE        | eBioscience   | IM7          | IgG2b, k       |
| <i>Immunosuppression markers</i> |           |               |              |                |
| <b>CTLA-4</b>                    | PE        | BD Bioscience | UC10-4F10-11 | IgG1, k        |
| <b>NKG2A</b>                     | Biotin*   | eBioscience   | 16a11        | IgG2b, k       |
| <b>PD-1</b>                      | PE        | BD Bioscience | J43          | IgG2, k        |
| <i>Chemokines and integrins</i>  |           |               |              |                |
| <b>CCR4</b>                      | PE        | Biolegend     | 2G12         | IgG            |
| <b>CCR10</b>                     | APC       | R&D System    | 248918       | IgG2b          |
| <b>CXCR3</b>                     | APC       | eBioscience   | CXCR3-173    | IgG            |
| <b>CD103</b>                     | APC       | eBioscience   | 2E7          | IgG            |

**Table 1: origin and description of monoclonal antibodies used for flow cytometry analysis.** FITC: Fluorescein isothiocyanate; PE: Phycoerythrin; PerCP: Peridinin chlorophyll protein; APC: Allophycocyanin. \*: NKG2A-biotin antibodies were co-incubated with streptavidin-APC (eBioscience). Vendors: BD Bioscience (San Jose, CA), eBioscience (San Diego, CA), Biolegend (San Diego, CA), R&D System (Minneapolis, MN).
